# Supplementary material for: Impact of Local Grasslands on Wild Grass Pollen Emission in Bavaria, Germany
Source: MDPI journal article supplement (doi:10.3390/land11020306), 2022-02-17
Supplement: s1 [file s1]

# Impact of Local Grasslands on Wild Grass Pollen Emission in Bavaria, Germany

Stephan Jung <sup>1,\*</sup>, Ye Yuan <sup>1</sup>, Maria Stange Del Carpio <sup>1</sup>, Thomas Pawlik <sup>2</sup>, Stephan Hartmann <sup>2</sup>, Nicole Estrella <sup>1</sup>, Jose Oteros <sup>3,4</sup>, Claudia Traidl-Hoffmann <sup>5,6</sup>, Athanasios Damialis <sup>5,7</sup>, Jeroen Buters <sup>4</sup> and Annette Menzel <sup>1,8</sup>

<sup>1</sup> TUM School of Life Sciences, Ecoclimatology, Technical University of Munich, 85354 Freising, Germany; stanley.yuan@tum.de (Y.Y.); maria.stange-del-carpio@tum.de (M.S.D.C.); estrella@tum.de (N.E.); annette.menzel@tum.de (A.M.)

<sup>2</sup> Bavarian State Research Center for Agriculture (LfL), Institute for Crop Science and Plant Breeding, 85354 Freising, Germany; thomas.pawlik@ifuplan.de (T.P.); stephan.hartmann@lfl.bayern.de (S.H.)

<sup>3</sup> Department of Botany, Ecology and Plant Physiology, University of Córdoba (UCO), 14071 Córdoba, Spain; jose.oteross@uco.es

<sup>4</sup> ZAUM- Center of Allergy & Environment, Member of the German Center for Lung Research (DZL), Technical University of Munich/Helmholtz Zentrum Munich, 80802 Munich, Germany; buters@tum.de

<sup>5</sup> Chair of Environmental Medicine, Faculty of Medicine, University of Augsburg, 86156 Augsburg, Germany; claudia.traidl-hoffmann@tum.de (C.T.-H.)

<sup>6</sup> Center for Allergy Research and Education (CK-CARE), 7265 Davos, Switzerland

<sup>7</sup> Department of Ecology, School of Biology, Faculty of Sciences, Aristotle University of Thessaloniki, 54124 Thessaloniki, Greece; dthanos@bio.auth.gr (A.D.)

<sup>8</sup> Institute for Advanced Study, Technical University of Munich, 85748 Garching, Germany

\* Correspondence: stephanjung@mytum.de

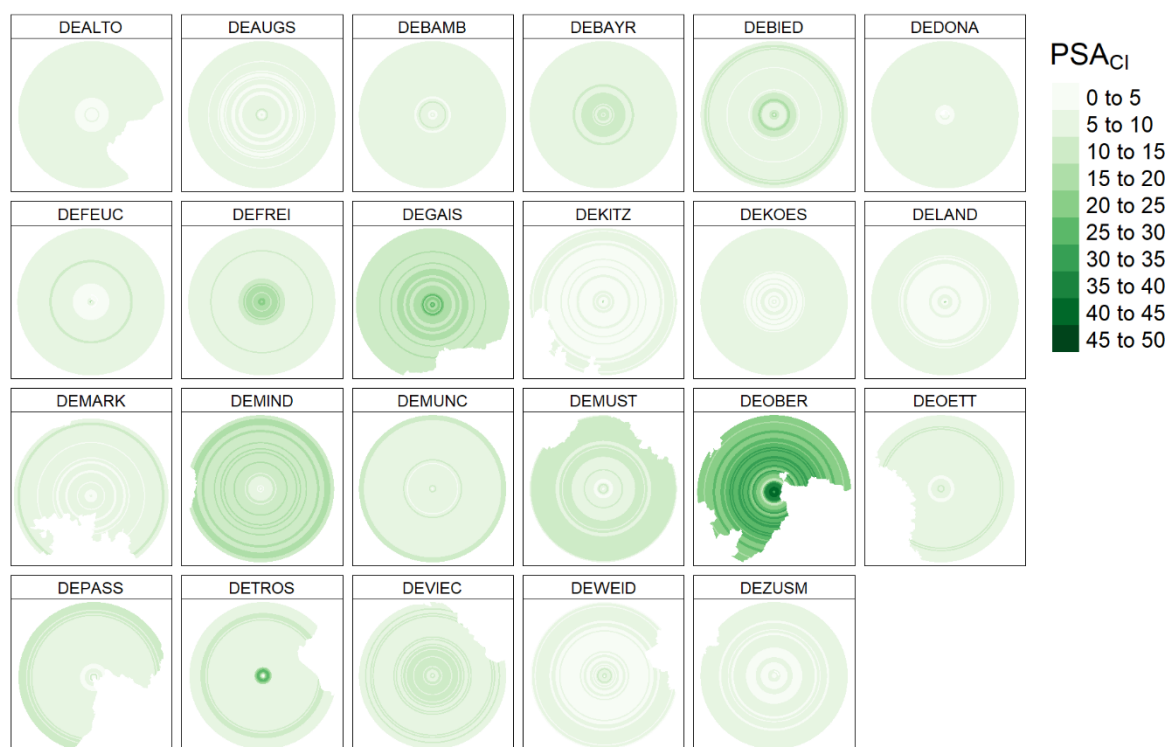

**Figure S1.** Polar plots of potential source areas weighted by cultivation intensity (PSA<sub>CI</sub>) for 500 m rings within 30-km radius circles around 23 selected pollen stations in Bavaria, Germany. Rings were calculated based on available data within the boundary of Bavaria, Germany. See methods for weighting procedure.

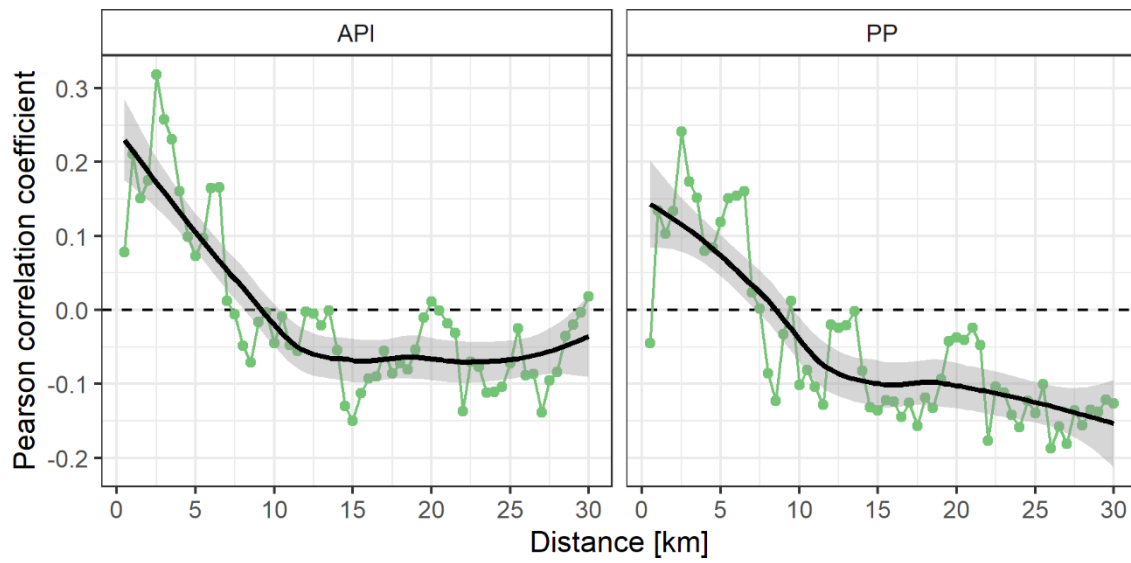

**Figure S2.** Correlation coefficients between potential source areas and annual pollen integral (API) and pollen peak (PP), respectively, for 23 selected pollen stations in Bavaria, Germany. The potential source areas have been weighted by cultivation intensity ( $PSA_{CI}$ ) for each of the 60 rings. Stations (DEUFS/DEGARM/DEBERC/DEHOF) were excluded. Loess smoothing was performed using `geom_smooth()` with a span of 0.7.

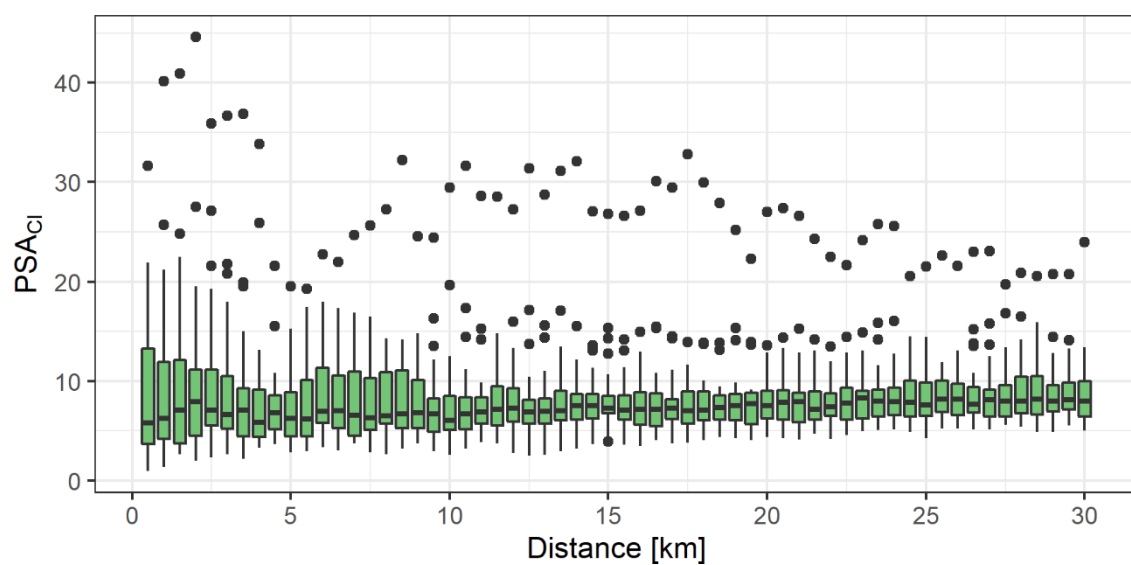

**Figure S3.** Boxplots showing the variability of potential source areas weighted by cultivation intensity (PSA<sub>Ci</sub>) from 23 selected pollen stations per 500-m distance.
